# Supplementary material
Source: PubMed Central journal article supplement (PMC3103382)

### Supplemental Figure Legends

**Supplemental Figure 1.** Effect of extracellular  $\text{Ca}^{2+}$  on ER  $\text{Ca}^{2+}$  release-induced eNOS Ser635 phosphorylation in BAECs. **(A)** Time-course effect of thapsigargin (TG) on eNOS Ser635 phosphorylation in the presence and absence of extracellular  $\text{Ca}^{2+}$ . Representative data were shown from three independent experiments. **(B)** Quantitative analyses of the time-course effect of TG on eNOS Ser635 phosphorylation with or without external  $\text{Ca}^{2+}$  (Mean  $\pm$  S.E., n=3).

**Supplemental Figure 2.** Effect of extracellular  $\text{Ca}^{2+}$  on ATP-triggered eNOS Ser635 phosphorylation in BAECs. **(A)** Time-course effect of ATP on eNOS Ser635 phosphorylation in the presence and absence of extracellular  $\text{Ca}^{2+}$ . Representative blots were shown from three independent experiments. **(B)** Quantitative analyses of the time-course effect of ATP on eNOS Ser635 phosphorylation with or without external  $\text{Ca}^{2+}$  (Mean  $\pm$  S.E., n=3).

**A**

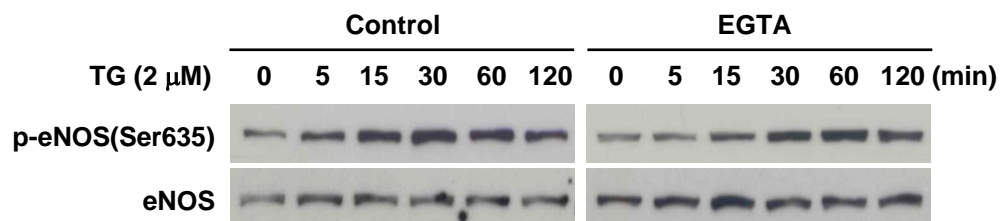

**B**

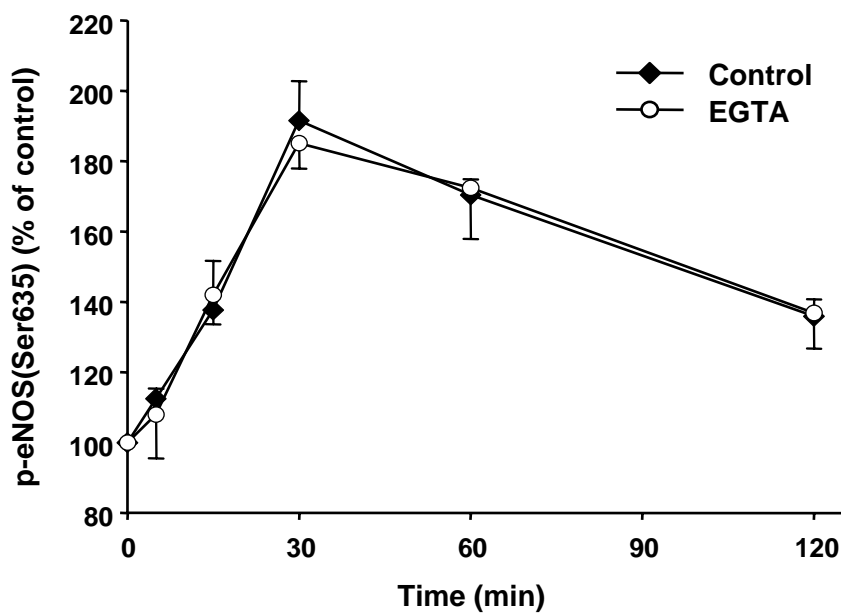

**A**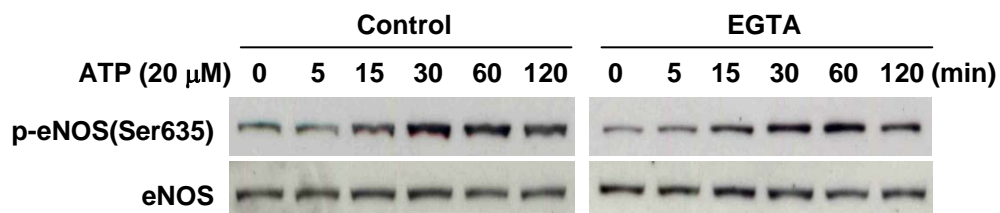**B**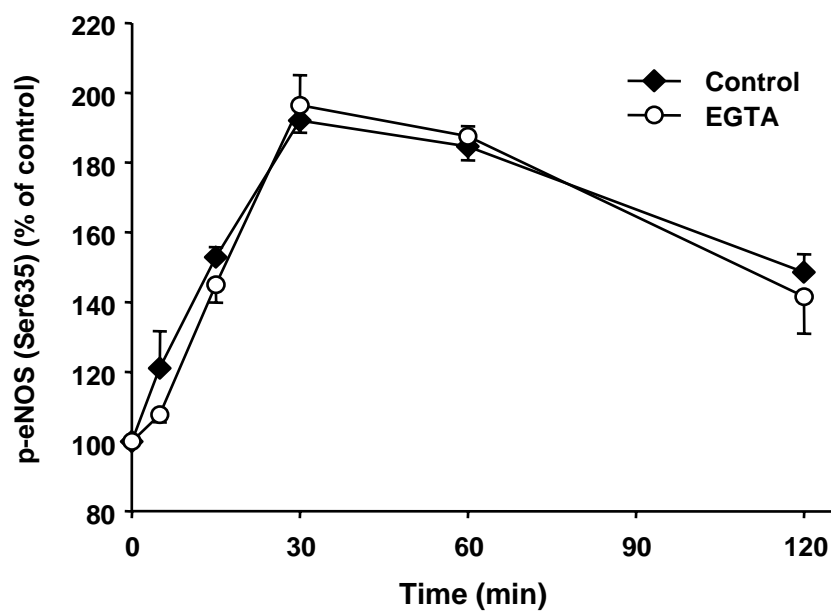

Supplement: supp_M111.220236_jbc.M111.220236-1.pdf [file supp_M111.220236_jbc.M111.220236-1.pdf]
